# Supplementary material for: Recent Advances in Ionic Liquids in Biomedicine
Source: PubMed Central journal article supplement (PMC8425867; doi:10.1002/advs.202004819), 2021-07-10
Supplement: ADVS-8-2004819-s001.pdf [file ADVS-8-2004819-s001.pdf]

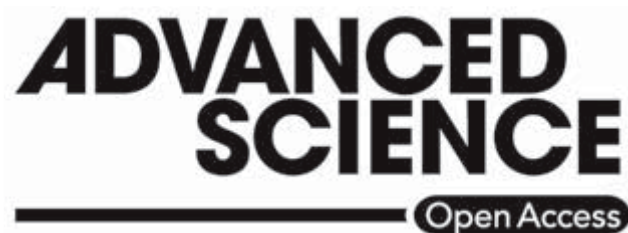

## Supporting Information

for *Adv. Sci.*, DOI: 10.1002/adv.202004819

### **Recent Advances in Ionic Liquids in Biomedicine**

*Alexander M. Curreri, Samir Mitragotri,\* and Eden E. L. Tanner\**

**Supporting Information Table 1.** Breakdown of the use of ILs discussed in each section, Solubilization and API-ILs are broken down by therapeutic class. Drug Delivery, Nanocarriers, and protein stabilization are broken down by application. Antimicrobial applications are broken down based on the strains that were tested, and biosensors broken down by classes of analytes. The references are color coordinated based on the IL class that was used in the following manner: Imidazolium, Choline/Quaternary Ammonium, Pyrrolidinium, Pyridinium, Dual API-IL, Amino Acid, Various/Other.

| <b>Solubilization</b>        |                                            | <b>API-ILs</b>                       |                                                                                     |
|------------------------------|--------------------------------------------|--------------------------------------|-------------------------------------------------------------------------------------|
| Anti-inflammatory            | 36, 41                                     | Antimicrobial                        | 44, 47, 48, 50, 51                                                                  |
| Antimicrobial                | 29, 30, 31, 32, 33, 34, 35, 41             | Anti-inflammatory                    | 46, 46, 49, 50, 52, 54, 56, 58, 59, 60, 61, 62, 63                                  |
| Anti-cancer                  | 30, 37, 41                                 | Anti-cancer                          | 55, 57                                                                              |
| Various/Other                | 28, 29, 38, 39, 40, 41, 42, 43             | Anesthetic                           | 46, 49, 59, 61                                                                      |
|                              |                                            | Various/Other                        | 45, 53                                                                              |
| <b>Drug Delivery</b>         |                                            | <b>Nanocarriers</b>                  |                                                                                     |
| Skin Delivery                | 65, 66, 67, 73, 80, 92, 94, 95, 96, 98, 99 | Synthesis                            | 101, 102, 105, 106, 130, 131, 132, 133                                              |
| Sustained Release            | 76, 78, 82, 83                             | Emulsions                            | 34, 103, 107, 110, 111, 112, 113                                                    |
| Controlled Release           | 68, 69, 70, 71, 72, 74, 75, 88, 89         | Responsive/Controllable Nanocarriers | 118, 119, 121, 125, 126                                                             |
| Responsive Release           | 75, 81, 84, 87                             | Nanocomposites/Surface Modification  | 100, 101, 102, 104, 105, 109, 114, 115, 116, 117, 120, 122, 123, 124, 127, 129, 134 |
| Oral Delivery                | 90, 91, 97                                 | Other                                | 108, 128, 135                                                                       |
| Gene Delivery                | 64, 67, 99                                 |                                      |                                                                                     |
| Other                        | 79, 85, 86, 93                             |                                      |                                                                                     |
| <b>Protein Stabilization</b> |                                            | <b>Antimicrobial</b>                 |                                                                                     |

|                               |                                                                 |
|-------------------------------|-----------------------------------------------------------------|
| <i>Thermal Stabilization</i>  | 136, 138, 148, 153, 160, 161, 166                               |
| <i>Therapeutic Proteins</i>   | 145, 152                                                        |
| <i>Enzyme Catalysis</i>       | 139, 140, 142, 147, 148, 149, 150, 151, 154, 159, 162, 163      |
| <i>Interaction Assessment</i> | 141, 143, 146, 155, 156, 157, 158, 164, 165                     |
| <i>Various/Other</i>          | 137, 144, 167, 168                                              |
| <b>Biosensors</b>             |                                                                 |
| <i>Glucose</i>                | 210, 211, 214, 216, 230                                         |
| <i>Biomarker</i>              | 212, 213, 219, 222, 226, 227, 231, 232, 235, 237                |
| <i>Therapeutic</i>            | 215, 218, 221, 222, 223, 224, 228, 234, 236, 238, 239, 240, 244 |
| <i>Internalized Chemicals</i> | 217, 220, 229, 233, 242                                         |
| <i>Various/Other</i>          | 241, 243, 245                                                   |

|                                        |                                                                                                                                  |
|----------------------------------------|----------------------------------------------------------------------------------------------------------------------------------|
| <i>Gram-positive</i>                   | 176, 184, 189, 205                                                                                                               |
| <i>Gram-negative</i>                   | 169, 174, 177, 187, 195                                                                                                          |
| <i>Both</i>                            | 170, 171, 172, 173, 175, 178, 179, 180, 181, 182, 183, 185, 186, 188, 190, 191, 192, 193, 194, 196, 197, 198, 199, 200, 201, 206 |
| <i>Fungi</i>                           | 170, 172, 173, 175, 183, 188, 198, 207                                                                                           |
| <i>Mold</i>                            | 188                                                                                                                              |
| <i>Membrane Interaction Assessment</i> | 202, 203, 204, 205                                                                                                               |

**Supporting Information Table 2. Solubilization of Drugs**

| <b>Reference Number</b> | <b>Drug Class</b>             | <b>Drug</b>                    | <b>Ionic Liquid(s) Used</b>                                                                      | <b>Water Solubility Improvement (fold increase)</b> | <b>Findings/Application</b>                                                                                                          |
|-------------------------|-------------------------------|--------------------------------|--------------------------------------------------------------------------------------------------|-----------------------------------------------------|--------------------------------------------------------------------------------------------------------------------------------------|
| 28                      | Other                         | Nucleoside                     | 1-Methoxyethyl-3-methylimidazolium trifluoroacetate, other Imidazolium, and Pyridinium-based ILs | >100                                                | Data suggested that ILs could be great solvents for sparingly soluble drugs                                                          |
| 29                      | Anti-parasite<br>Hormone      | Albendazole<br>Danazol         | 1-butyl-3- methylimidazolium hexafluorophosphate                                                 | >10000<br>>30000                                    | Showed that altering imidazolium-cation structure can drastically affect solubility results                                          |
| 30                      | Antiviral<br>Chemotherapeutic | Acyclovir<br>Methotrexate      | 1,3-Dimethylimidazolium dimethyl phosphate                                                       | Not specified                                       | Drug solubility in aqueous solution can be increased with increasing IL concentrations                                               |
| 31                      | Antibiotic                    | Erythromycin                   | Imidazolium, phosphonium, quaternary ammonium, and pyrrolidinium ILs                             | Not specified                                       | Assessed thermodynamic properties of drug solubilization                                                                             |
| 32                      | Antifungal                    | Amphotericin B<br>Itraconazole | 1-ethyl-3-methyl-imidazolium acetate [m-PEG350-NH3][C9COO]                                       | >400,000<br>>5,000,000                              | Improved solubility of anti-fungal drugs                                                                                             |
| 33                      | Antifungal                    | Nimesulide                     | 1-ethyl-3 methylimidazolium tetrafluoroborate                                                    | Not specified                                       | Understanding the IL-drug interactions and how they affect binding                                                                   |
| 34                      | Antiviral                     | Acyclovir                      | Acetate anion with quaternary ammonium and imidazolium cations                                   | >20-fold                                            | Anti-viral drug used for herpes infections                                                                                           |
| 35                      | Antiviral                     | Acyclovir                      | Cholinium glycinate and other choline amino acid ILs                                             | >550-fold                                           |                                                                                                                                      |
| 36                      | Anti-inflammatory             | Ibuprofen                      | [C4C1im][N(CN)2]                                                                                 | 120-fold                                            |                                                                                                                                      |
| 37                      | Chemotherapeutic              | Paclitaxel                     | Cholinium glycinate and other choline amino acid ILs                                             | >5000-fold                                          | Similar cancer cytotoxicity to current formulation without the need for CrEL (used for solubilization but has negative side effects) |
| 38                      | Antidepressant                | Nortriptyline Hydrochloride    | 1-decyl-3-methylimidazolium chloride                                                             |                                                     | Thermodynamic and Supramolecular Characterization                                                                                    |
| 39                      | Anesthetic                    | Lidocaine<br>Procaine          | 1-dodecyl-2,3-dimethylimidazolium chloride                                                       | N/A                                                 | Investigation of interactions involved in the IL system                                                                              |
| 40                      | Natural                       | Curcumin                       | cholinium oleate                                                                                 | >700                                                | Enhanced water solubility with low (1 mg/mL) concentration of IL                                                                     |

| <b>Reference Number</b> | <b>Drug Class</b>                                                     | <b>Drug</b>                                                 | <b>Ionic Liquid(s) Used</b>                                                                     | <b>Water Solubility Improvement (fold increase)</b> | <b>Findings/Application</b>                                                   |
|-------------------------|-----------------------------------------------------------------------|-------------------------------------------------------------|-------------------------------------------------------------------------------------------------|-----------------------------------------------------|-------------------------------------------------------------------------------|
| 41                      | Anti-inflammatory<br>Antiviral<br>Chemotherapeutic<br>Muscle Relaxant | Celecoxib<br>Acyclovir<br>Methotrexate<br>Dantrolene sodium | 1,3-dimethylimidazolium dimethyl phosphate                                                      | >600-fold<br>35-fold<br>>300-fold<br>60-fold        | Improvement of a variety of small molecule drugs in IL aqueous solution       |
| 42                      | Anticonvulsant                                                        | Lamotrigine                                                 | 1-octyl-3-methylimidazolium bromide                                                             | N/A                                                 | Analysis of solvation and thermodynamic functions of the IL-water-drug system |
| 43                      | Cardiovascular Drugs                                                  | LASSBio-294                                                 | 1-ethyl-3-methylimidazolium methyl phosphonate and other imidazolium ILs, Ethylammonium acetate | N/A                                                 | Computational study of IL-interactions with a cardiovascular drug             |

**Supporting Information Table 3. API-ILs**

| <b>Reference Number</b> | <b>Drug Class</b> | <b>Active Ingredient</b>                    | <b>Counter Ion</b>                                                      | <b>Water Solubility Improvement (fold increase)</b> | <b>Findings/Application</b>                                                                            |
|-------------------------|-------------------|---------------------------------------------|-------------------------------------------------------------------------|-----------------------------------------------------|--------------------------------------------------------------------------------------------------------|
| 44                      | Anesthetic        | Lidocaine                                   | Docusate                                                                | decreased solubility by >15                         | Showed API-IL formulation increased efficacy of drug <i>in vitro</i> compared standard formulation     |
| 45                      | Various           | Various small molecule drugs                | Various counter ions                                                    | N/A                                                 | A position paper that suggests API-ILs have the potential for enhanced delivery of small molecules     |
| 46                      | Anti-inflammatory | Aspirin (as salicylate or acetylsalicylate) | various counter ions                                                    | N/A                                                 | Doubly effective ILs with antibacterial, analgesic, local anesthetic, and antiarrhythmic cations       |
| 47                      | Antibiotic        | Ampicillin                                  | Choline                                                                 | ~10                                                 | Enhanced water solubility at physiological temperature                                                 |
| 48                      | Antibiotic        | $\beta$ -Lactam                             | 1-hexadecyl-3-methylimidazolium and 1-hexadecyl-2,3-dimethylimidazolium | Poorer water solubility                             | Allowed for decreased antibacterial IC <sub>50</sub> concentrations of $\beta$ -Lactam <i>in vitro</i> |

| <i>Reference Number</i> | <i>Drug Class</i>                                                                | <i>Active Ingredient</i>                                        | <i>Counter Ion</i>                                                            | <i>Water Solubility Improvement (fold increase)</i> | <i>Findings/Application</i>                                                    |
|-------------------------|----------------------------------------------------------------------------------|-----------------------------------------------------------------|-------------------------------------------------------------------------------|-----------------------------------------------------|--------------------------------------------------------------------------------|
| 49                      | Anesthetic<br>Anti-inflammatory                                                  | Lidocaine<br>Ibuprofen                                          | N/A                                                                           | N/A                                                 | Faster release of both therapeutic molecules                                   |
| 50                      | Anti-inflammatory<br>Antimicrobial                                               | Ibuprofen<br>Benzalkonium                                       | N/A                                                                           | N/A                                                 | Characterization of a API-IL with two active components                        |
| 51                      | Antimicrobial                                                                    | Benzethonium chloride                                           | L-proline                                                                     | N/A                                                 | Analysis of IL characteristics and biomolecule interactions                    |
| 52                      | Anti-inflammatory                                                                | Salicylic Acid                                                  | 1-hexyl-3-methylimidazolium                                                   | N/A                                                 | Thermophysical property study                                                  |
| 53                      | Beta blocker (heart disease)                                                     | Carvedilol                                                      | Citric Acid, Tartaric Acid, Saccharin                                         | 2                                                   | Potential improved treatment of high blood pressure/heart failure              |
| 54                      | Anti-inflammatory                                                                | Mefenamic acid                                                  | Choline, ammonium ions                                                        | N/A                                                 | Development of a potential oral solid or gel NSAID                             |
| 55                      | Chemotherapeutic                                                                 | Methotrexate                                                    | quaternary ammonium, imidazolium, phosphonium, and amino acid derived cations | >5000                                               | New formulation for common chemotherapeutic                                    |
| 56                      | Anti-inflammatory                                                                | Diclofenac                                                      | Imidazolium                                                                   | 42                                                  | Analgesic and Anti-inflammatory                                                |
| 57                      | Anti-cancer                                                                      | Alendronic Acid                                                 | C2OHMIM, and other quaternary ammonium cations and superbases                 | >2000                                               | Improved anti-cancer efficacy (specifically osteosarcoma)                      |
| 58                      | Anti-inflammatory                                                                | Salicylic Acid                                                  | L-Proline ethyl ester and other Amino Acid Esters                             | >500                                                | Used as model drug                                                             |
| 59                      | Anti-inflammatory                                                                | Salicylic Acid                                                  | 3-heptyl-1-vinylimidazolium                                                   | N/A                                                 | Microneedle IL-drug structures for topical acne treatment                      |
| 60                      | Anesthetic<br>Anti-inflammatory                                                  | Lidocaine<br>Ibuprofen                                          | N/A                                                                           | N/A                                                 | Two incorporated drugs for anesthetic and anti-inflammatory topical treatments |
| 61                      | Anesthetic<br>Anti-inflammatory                                                  | Lidocaine<br>Ibuprofen                                          | N/A                                                                           | N/A                                                 | Sustained release of lidocaine and ibuprofen over 10 days                      |
| 62                      | Anti-inflammatory                                                                | Ibuprofen                                                       | 1-butyl-3-methylimidazolium                                                   | >1000                                               | Topical delivery of ibuprofen                                                  |
| 63                      | Anti-inflammatory<br>Anti-inflammatory<br>Anti-inflammatory<br>Anti-inflammatory | Tolfenamic Acid<br>Meclofenamic Acid<br>Diclofenac<br>Ibuprofen | Quaternary ammonium ions                                                      | at least 50 in all cases                            | Demonstration of API-IL forming capabilities of weakly acidic compounds        |

**Supporting Information Table 4. Drug Delivery**

| <b>Reference Number</b> | <b>Delivery Application</b> | <b>Drug/Payload of Interest</b> | <b>Ionic Liquid(s) Used</b>                                                                 | <b>Findings/Application</b>                                                                                         |
|-------------------------|-----------------------------|---------------------------------|---------------------------------------------------------------------------------------------|---------------------------------------------------------------------------------------------------------------------|
| 64                      | Gene Delivery               | plasmid DNA                     | 3-butyl-1-vinylimidazolium L-proline                                                        | Enhanced transfection of plasmid into cell with minimal decrease in cell viability for gene delivery                |
| 65                      | Skin                        | N/A                             | 1-butyl-3- methylimidazolium hexafluorophosphate and 1-hexyl-3- methylimidazolium chloride  | Topical delivery of fluorescently labeled model drug                                                                |
| 66                      | Skin                        | Cefadroxil                      | choline geranate                                                                            | Biofilm removal and transdermal antibiotic delivery                                                                 |
| 67                      | Skin/ Gene Delivery         | RNAi                            | Benzyl dimethyl octyl ammonium                                                              | Transdermal delivery of RNAi for treatment of skin diseases                                                         |
| 68                      | Controlled Release          | Ibuprofen                       | 1-methyl-3-butylimidazolium ibuprofenate                                                    | API-IL ionogel for controlled release of anti-inflammatory                                                          |
| 69                      | Controlled Release          | N/A                             | tetrabutylphosphonium styrenesulfonate and tributyl-hexyl phosphonium 3-sulfopropylacrylate | Thermo-responsive IL gel for potential controlled release                                                           |
| 70                      | Controlled Release          | N/A                             | Choline Chloride. Malonic Acid                                                              | Assessment of IL-water interactions and micelle formation                                                           |
| 71                      | Controlled Release          | N/A                             | [Cholesterol Glycine][AOT]                                                                  | Assessment of IL-water interactions and micelle formation, with some ongoing work as drug carriers                  |
| 72                      | Controlled Release          | N/A                             | 1-ethyl-3- methylimidazolium acetate                                                        | Formed stable microemulsions that showed anticancer activity                                                        |
| 73                      | Skin                        | Acyclovir<br>Methotrexate       | triethylammonium acetate and diethylammonium acetate                                        | Microemulsion drug carriers for sparingly soluble drugs, with potential transdermal applications                    |
| 74                      | Controlled Release          | Tetracaine                      | 1-hexyl-3-methylimidazolium dodecylsulfate                                                  | Characterization study for drug-IL interactions to elucidate supramolecular structures                              |
| 75                      | Responsive Release          | Vitamin E                       | 1-Hexadecyl-3-Methylimidazolium chloride                                                    | Bile Salt triggered dissociation of IL microemulsions for potential targeted release of vitamin E (and other drugs) |
| 76                      | Controlled Release          | Dexamethasone                   | 4-dodecyl-4- methylmorpholinium chloride, 1-dodecyl-1- methylpyrrolidinium chloride         | Potential delayed release of poorly water-soluble corticosteroid                                                    |
| 77                      | Responsive Release          | Camptothecin                    | choline chloride/citric acid DES                                                            | pH dependent delayed release of camptothecin                                                                        |
| 78                      | Sustained Release           | Piroxicam                       | 1-hexyl-3-methylimidazolium chloride and 1-butyl-3- methylimidazolium hexafluorophosphate   | For sustained analgesic release (over 50 hours)                                                                     |
| 79                      | Various/Other               | Amphotericin B                  | dicholinium bis(trifluoromethanesulfonyl)imide                                              | A potential IV antiviral treatment (normal formulation causes hemolysis)                                            |

| <i>Reference Number</i> | <i>Delivery Application</i> | <i>Drug/Payload of Interest</i> | <i>Ionic Liquid(s) Used</i>                                                                 | <i>Findings/Application</i>                                                                                     |
|-------------------------|-----------------------------|---------------------------------|---------------------------------------------------------------------------------------------|-----------------------------------------------------------------------------------------------------------------|
| 80                      | Skin                        | Dencichine                      | 1-hydroxyethyl-3-methylimidazolium chloride and 1-butyl-3-methylimidazolium dodecanesulfate | Topical delivery of dencichine (potential hemostatic abilities)                                                 |
| 81                      | Responsive Release          | Aspirin                         | 1-allyl-3-methylimidazolium chloride                                                        | pH-sensitive controlled release system of model drug aspirin                                                    |
| 82                      | Sustained Release           | Ranitidine hydrochloride        | 1-Ethyl-3-methylimidazolium acetate                                                         | Sustained release over 10h from gastric-floating gels                                                           |
| 83                      | Sustained Release           | Salicylic Acid                  | Poly[trimethylammonium (meth)acrylate] salicylate                                           | Sustained release from API-IL polymer                                                                           |
| 84                      | Responsive Release          | N/A                             | choline based poly-IL                                                                       | Electrically conductive biodegradable hydrogels for drug delivery or tissue engineering                         |
| 85                      | Sustained Release           | Acetylsalicylate                | 1-dodecyl-1-methylpiperidinium acetylsalicylate                                             | IL micelles were loaded into different viscoelastic gels for delayed release                                    |
| 85                      | Other                       | 5-fluorouracil                  | choline chloride xylitol                                                                    | Enhanced anti-cancer of 5-fluorouracil                                                                          |
| 86                      | Other                       | Cyanocobalamin                  | 1-ethyl-3-methylimidazolium acetate                                                         | Sublingual delivery for treatments of vitamin B12 deficiency                                                    |
| 87                      | Responsive Release          | Doxorubicin                     | 3-n-butyl-1-vinylimidazolium trichloromonobromoferrate                                      | Magnetic, Near-infrared triggered nanocomposites allow for externally controllable release of chemotherapeutics |
| 88                      | Controlled Release          | Doxorubicin<br>Mitoxantrone     | Various 1-alkyl-3-methylimidazolium ILs                                                     | Analysis of drug solubility in various ILs mixtures                                                             |
| 89                      | Controlled Release          | NO                              | Various choline, imidazolium, and taurine based ILs                                         | Controlled release of NO for inhibition of tumor growth                                                         |
| 90                      | Oral                        | Selurampanel                    | Alkyl, Benzyl, Hydroxyl, Dication and Trication molecules with selurampanel anions          | Oral delivery of sparingly water-soluble drug with controllable bioavailability based on cation used            |
| 91                      | Oral                        | Insulin                         | Cholinium geranate                                                                          | Oral insulin delivery system                                                                                    |
| 92                      | Skin                        | Insulin                         | Cholinium geranate                                                                          | Transdermal insulin delivery system                                                                             |
| 93                      | Other                       | Insulin                         | Cholinium geranate                                                                          | Buccal insulin delivery                                                                                         |
| 94                      | Skin                        | Diltiazem                       | various 1,4-diazabicyclo[2.2.2]octane-based ILs                                             | Potential transdermal delivery system for high blood pressure                                                   |
| 95                      | Skin                        | FITC-Dextran                    | cholinium malate                                                                            | Drug model showed potential for transdermal delivery of hydrophilic macromolecules                              |
| 96                      | Skin/Gene Delivery          | siRNA                           | Cholinium geranate and cholinium hydrocinnamate                                             | Topical delivery of NFkBIZ siRNA for treatment of psoriasis                                                     |
| 97                      | Oral                        | mAb                             | Cholinium glycolate                                                                         | Potential for oral delivery of monoclonal antibodies                                                            |



| <i>Reference Number</i> | <i>Delivery Application</i> | <i>Drug/Payload of Interest</i> | <i>Ionic Liquid(s) Used</i>                                           | <i>Findings/Application</i>                                                            |
|-------------------------|-----------------------------|---------------------------------|-----------------------------------------------------------------------|----------------------------------------------------------------------------------------|
| 98                      | Skin                        | Antigen peptide                 | Cholinium -fatty carboxylic acid                                      | Potential transdermal vaccine                                                          |
| 99                      | Skin                        | Ruxolitinib<br>Acarbose         | A variety of choline and quaternary ammonium with carboxylic acid ILs | Demonstrated that interactions between ions can give indication of transdermal potency |

**Supporting Information Table 5. Nanocarriers**

| <i>Reference Number</i> | <i>Nanocarrier Application</i>     | <i>Therapeutic Payload</i>                       | <i>Nanomaterial</i>                          | <i>Ionic Liquid(s) Used</i>                     | <i>Findings/Application</i>                                                                      |
|-------------------------|------------------------------------|--------------------------------------------------|----------------------------------------------|-------------------------------------------------|--------------------------------------------------------------------------------------------------|
| 100                     | Nanocomposites                     | IL                                               | Silica                                       | 1-alkyl-3- methylimidazolium tetrafluoroborate  | Controlled release of IL from surface of silica nanoparticles for antibacterial purposes         |
| 101                     | Synthesis and Surface Modification | Plasmid DNA                                      | Mesoporous silica                            | 1-alkyl-3-methylimidazolium based IL            | IL was used for synthesis and templating of the nanoparticles                                    |
| 102                     | Synthesis and Surface Modification | Ibuprofen                                        | Silica                                       | 1-butyl-3-methylimidazolium tetrafluoroborate   | Ionic liquid used to synthesize particles for extended release of ibuprofen for weeklong release |
| 34                      | Emulsion                           | Acyclovir                                        | IL-in-oil emulsion                           | dimethylimidazolium dimethylphosphate           | Increased solubility and delivery of model drug                                                  |
| 103                     | Emulsion                           | Dopamine hydrochloride<br>Acetylcholine chloride | IL micelles                                  | 1-tetradecyl-3-methylimidazolium bromide        | Assessment of IL-drug interactions revealed importance of $\pi$ - $\pi$ interactions             |
| 104                     | Nanocomposites                     | Doxorubicin                                      | poly(ionic liquid-co-N-isopropylacrylamide)  | 1-ethylvinyl pyridinium deoxycholate            | pH and temperature responsive nanocarriers for potential targeted delivery of chemotherapeutics  |
| 105                     | Synthesis and Surface Modification | N/A                                              | europium(III)-doped gadolinium(III) fluoride | 1-butyl, 2- methylimidazolium tetrafluoroborate | IL used for synthesis and surface modification of quasi spherical biosafe nanoparticles          |
| 106                     | Synthesis                          | Curcumin                                         | poly(2-hydroxyethyl methacrylate)            | choline formate                                 | Enhanced cytotoxicity of curcumin in cancer cell line, IL used for synthesis                     |
| 107                     | Emulsion                           | Mitoxantrone hydrochloride                       | Starch                                       | 1-butyl-3-methylimidazolium hexafluorophosphate | Starch nanoparticles synthesized within IL-in-water microemulsion                                |
| 108                     | Various                            | Various                                          | Various                                      | Various                                         | Review focuses solely on ionic liquid incorporation into nanocarriers                            |

| <i>Reference Number</i> | <i>Nanocarrier Application</i> | <i>Therapeutic Payload</i> | <i>Nanomaterial</i>                             | <i>Ionic Liquid(s) Used</i>                                           | <i>Findings/Application</i>                                                                                                                        |
|-------------------------|--------------------------------|----------------------------|-------------------------------------------------|-----------------------------------------------------------------------|----------------------------------------------------------------------------------------------------------------------------------------------------|
| 109                     | Nanocomposites                 | Rutin                      | PLGA                                            | Cholinium Phenylalaninate and Cholinium Glycinate                     | IL-NPs increases the water solubility of the anti-renal cell carcinoma drug                                                                        |
| 110                     | Emulsion                       | N/A                        | IL-in-water, water-in-IL                        | Phosphonium and choline-based                                         | Important molecular dynamics study to assess the types of structures that are formed in IL-aqueous solutions                                       |
| 111                     | Emulsion                       | N/A                        | N/A                                             | Various 1-alkyl-3-methylimidazolium ILs                               | Found that IL cytotoxicity was did not strictly follow the concentration addition model. Important paper for understanding nano structuring events |
| 112                     | Emulsion                       | Sorafenib                  | IL-water nano emulsion                          | Cholinium Geranate                                                    | Enhanced biodistribution and elimination half-life of kinase inhibitor                                                                             |
| 113                     | Emulsion                       | Sorafenib                  | IL-water nano emulsion                          | Cholinium Geranate                                                    | Continuation of 112, suggesting the IL prevents sorafenib from leaving the cell once internalized                                                  |
| 114                     | Surface Modification           | N/A                        | Graphene                                        | Various choline chloride - carboxylic acid DESs                       | Improved biocompatibility of graphene by IL functionalization, potential use as a new nanocarrier for small molecules                              |
| 115                     | Surface Modification           | N/A                        | Silver/Manganese oxide/bentonite nanocomposites | N-trimethyl-N-propylammonium bis(trifluoromethanesulfonyl)imide       | Biocompatible, antibacterial nanocomposites that are synthesized and capped using IL                                                               |
| 116                     | Surface Modification           | N/A                        | Chitosan                                        | Tetramethylammonium hydroxide                                         | Enhanced time stability of chitosan-based microparticles as potential drug carriers                                                                |
| 117                     | Nanocomposites                 | N/A                        | montmorillonite layers                          | 4,4'-Bis(2-ethoxymethylimidazolium)azobenzene N-Methylimidazole       | UV responsive "molecular jacks" that could be used to create smart sunscreens                                                                      |
| 118                     | Responsive Nanocarriers        | Doxorubicin                | zeolitic imidazolate framework-8                | 1-Butyl-3- methylimidazolium hexafluorophosphate                      | Microwave sensitive nanocarriers for externally controllable chemotherapeutic release                                                              |
| 119                     | Responsive Nanocarriers        | Doxorubicin                | Zirconia/TPP/iRGD nanospheres                   | 1-Butyl-3- methylimidazolium hexafluorophosphate                      | Microwave-sensitive mitochondria-targeting nanocarriers for externally controllable chemotherapeutic release                                       |
| 120                     | Surface Modification           | Curcumin                   | Carbon dots                                     | 1,3-dibutylimidazolium nitrate and a variety of imidazolium-based ILs | Enhanced curcumin delivery into cells making it a more efficacious cancer therapy                                                                  |
| 121                     | Responsive Nanocarriers        | Curcumin                   | silica-graphene oxide nanoparticles             | Aspartic acid-based                                                   | pH sensitive with potentially widespread pharmaceutical applications                                                                               |

| <i>Reference Number</i> | <i>Nanocarrier Application</i> | <i>Therapeutic Payload</i>            | <i>Nanomaterial</i>                                              | <i>Ionic Liquid(s) Used</i>                                              | <i>Findings/Application</i>                                                                                                      |
|-------------------------|--------------------------------|---------------------------------------|------------------------------------------------------------------|--------------------------------------------------------------------------|----------------------------------------------------------------------------------------------------------------------------------|
| 122                     | Surface Modification           | N/A                                   | PLGA nanoparticles                                               | Cholinium hexenoate                                                      | Protein avoidant nanoparticles with enhanced biodistribution to lungs                                                            |
| 123                     | Nanocomposites                 | Mefenamic Acid                        | poly(L-lactide)                                                  | Choline mefenamate and di(2-hydroxyethyl)dimethyl ammonium mefenamate    | API-IL nanocomposites for carriers of sparingly soluble small molecule drugs                                                     |
| 124                     | Nanocomposites                 | Mefenamic Acid                        | poly(L-lactide)                                                  | various quaternary ammonium ILs                                          | Same as previous but explores a wider variety of IL structures                                                                   |
| 125                     | Responsive Nanocarriers        | Methotrexate                          | montmorillonite layers                                           | 1,2,3- benzotriazolium hexafluorophosphate                               | pH sensitive anti-cancer drug release                                                                                            |
| 126                     | Responsive Nanocarriers        | Doxorubicin                           | Hyaluronic/Folic/p-hydroxyazobenzene/DMAEMA                      | 1-vinyl-3-hexylimidazolium bis(trifluoromethylsulfonyl)imide             | pH and light responsive nanocarriers for externally controllable tumor targeting and release of chemotherapeutics                |
| 127                     | Nanocomposites                 | Quercetin, Indomethacin, Erythromycin | choline-methacrylate copolymer                                   | choline salicylate and choline sulfacetamide                             | dual delivery of anti-inflammatory and antibacterial agents by encapsulation of erythromycin in salicylate poly-IL nanoparticles |
| 128                     | Other                          | N/A                                   | Platinum/PNIPAM                                                  | 3-[11-(2-bromo-2-methyl-1-oxopropoxy)undecyl]-1-vinylimidazolium bromide | Nanomotors which have non-Brownian motion in hydrogen peroxide solution                                                          |
| 129                     | Nanocomposites                 | N/A                                   | PNIPAM                                                           | Various choline based ILs                                                | Study on the phase behavior of PNIPAM and IL mixtures                                                                            |
| 130                     | Synthesis                      | Fenbufen                              | Carbon nanotubes/4-vinylpyridine/ ethylene glycol dimethacrylate | 1-butyl-3-methylimidazoliumtetrafluoroborate                             | Synthesis of nanocomposites for anti-inflammatory drug delivery applications                                                     |
| 131                     | Synthesis                      | N/A                                   | Bovine Serum Albumin                                             | 1-butyl-3-methyl imidazolium tetrafluoroborate                           | IL allowed for facile-synthesis of BSA nanoparticles                                                                             |
| 132                     | Synthesis                      | N/A                                   | Chlorotoxin/cellulose                                            | N-methylpyrrolidinium hydrogen sulfate                                   | Synthesis of nanoparticles with enhanced glioblastoma uptake in IL solvent                                                       |
| 133                     | Synthesis                      | Indomethacin                          | Starch                                                           | 1-hydroxypropyl-3-methylimidazolium acetate                              | Starch nanoparticles synthesized using IL-in-oil microemulsion showed better release of model drug than normal starch particles  |
| 134                     | Nanocomposites                 | Doxorubicin and Methotrexate          | Chitosan/Iron Oxide/mPEG                                         | 1-methyl-3-(oxiran-2-ylmethyl)-1H-imidazol-3-ium chloride                | Targeted "stealth" chitosan-IL nanocomposites for potential breast cancer treatment                                              |
| 135                     | Responsive Nanocarriers        | Pyrene or Ciprofloxacin               | IL-water nanoemulsion                                            | [ProC 10 ][FeCl 3 Br]                                                    | Magnetic nanocarrier of hydrophobic drugs                                                                                        |

**Supporting Information Table 6. Protein Stabilization**

| <b>Reference Number</b> | <b>Application/Protein Class</b>          | <b>Protein/Peptide</b>    | <b>Ionic Liquid(s) Used</b>                                                                           | <b>Stabilization Improvements (generally time or temperature)</b>             | <b>Findings/Application</b>                                                                                                 |
|-------------------------|-------------------------------------------|---------------------------|-------------------------------------------------------------------------------------------------------|-------------------------------------------------------------------------------|-----------------------------------------------------------------------------------------------------------------------------|
| 136                     | Thermal Stabilization                     | Cytochrome c              | Choline dihydrogen phosphate                                                                          | Stabilized protein above 90°C                                                 | IL helped to stabilize protein against heat degradation                                                                     |
| 137                     | Other/Variou                              | Alcohol dehydrogenase     | quaternary ammonium (Ammonium)                                                                        | N/A                                                                           | Purification and stabilization of proteins from cell lysates                                                                |
| 138                     | Thermal Stabilization                     | Ribonuclease A            | Choline dihydrogen phosphate<br>1-ethyl-3-methylimidazolium dicyanamide                               | Increased T <sub>m</sub> by 20°C at higher concentrations                     | IL structure has a significant effect on protein stability choline-based increased thermal stability, imidazolium decreased |
| 139                     | Enzyme Catalysis                          | $\alpha$ -chymotrypsin    | Various ILs from choline, imidazolium, and phosphonium families                                       | N/A                                                                           | Found that triethyl ammonium acetate can help with refolding                                                                |
| 140                     | Enzyme Catalysis                          | Lysozyme                  | ethylammonium nitrate                                                                                 | Recovery of 90% of enzyme after two cycles, compared to 20% in IL-free buffer | IL increased enzyme recovery after multiple cycles with 80% recovery after 10 cycles                                        |
| 141                     | Interaction Assessment                    | Bovine Serum Albumin      | 1-tetradecyl-3-methylimidazolium bromide                                                              | N/A                                                                           | Denaturation of protein appears to be due to the hydrophobic interactions between IL and tryptophan residues                |
| 142                     | Enzyme Catalysis                          | Various enzymes           | Various                                                                                               | N/A                                                                           | Early review of enzyme stability, activity, and interactions in IL formulations                                             |
| 143                     | Interaction Assessment                    | Various cyclic dipeptides | Various ammonium-based ILs                                                                            | N/A                                                                           | Showed that ILs stabilize the structure of dipeptides by exclusion from the protein surface                                 |
| 144                     | Various                                   | Various                   | Various                                                                                               | N/A                                                                           | Early review for selective design of ionic liquids in protein systems                                                       |
| 145                     | Therapeutic Proteins                      | Insulin                   | various imidazolium and ammonium-based ILs                                                            | Recovery of 80% of monomer secondary structure after cryopreservation         | Cryopreservation of amyloid fibers with later monomer recovery                                                              |
| 146                     | Interaction Assessment                    | Xaa-Pro Dipeptides        | 1-butyl-1-methylpyrrolidinium bis(trifluoromethylsulfonyl) imide                                      | N/A                                                                           | Ionic liquids can be used to stabilize normally unfavorable dipeptide conformations                                         |
| 147                     | Enzyme Catalysis                          | Lysozyme and BSA          | 1-dodecyl-3-methyl imidazolium bromide ([C12mim]Br)                                                   | N/A                                                                           | Dilatational Rheology to assess protein-IL interactions at an oil-water interface                                           |
| 148                     | Enzyme Catalysis<br>Thermal Stabilization | Lysozyme                  | 1-ethyl-3-methylimidazolium bis-(trifluoromethylsulfonyl)imide and 1-butyl-3-alkylimidazolium bromide | Increase stability and activity limits of lysozyme from 75°C to 120°C         | Microemulsions with ethylene glycol core and IL shells for better lysozyme/enzyme shelf life                                |

| <b>Reference Number</b> | <b>Application/Protein Class</b> | <b>Protein/Peptide</b> | <b>Ionic Liquid(s) Used</b>                               | <b>Stabilization Improvements (generally time or temperature)</b>                                       | <b>Findings/Application</b>                                                                                                                                                                                   |
|-------------------------|----------------------------------|------------------------|-----------------------------------------------------------|---------------------------------------------------------------------------------------------------------|---------------------------------------------------------------------------------------------------------------------------------------------------------------------------------------------------------------|
| 149                     | Enzyme Catalysis                 | Lipase                 | 1-Butyl-3-methylimidazolium trifluoromethanesulfonate     | N/A                                                                                                     | Positively charged amino acids near binding cleft exclude IL cations which help to stabilize enzymes, while hydrophobic amino acids at the same location can cause loss of enzyme function in IL formulations |
| 150                     | Enzyme Catalysis                 | Lysozyme               | N-alkyl-N-methylmorpholinium bromide                      | Extended the retention of bacterolytic activity (70% in control vs 90% in IL formulation) after 4 weeks | Extending lysozyme/enzyme shelf life                                                                                                                                                                          |
| 151                     | Enzyme Catalysis                 | Lipase                 | 1-(3-Aminopropyl)-imidazolium hexafluorophosphate         | Improved initial enzyme activity by 6.68 times and repeated use activity by about 30%                   | Enhancing lipase initial and retention of activity                                                                                                                                                            |
| 152                     | Interaction Assessment           | ε-poly-l-lysine        | 2-hydroxyethyl ammonium formate                           | N/A                                                                                                     | Formation of a thermoreversible soft gel and molecular docking suggest cation stabilizes the polypeptide                                                                                                      |
| 153                     | Thermal Stabilization            | Insulin                | cholinium glutamate                                       | Increase denaturation temperature by 9.6°C                                                              | Better storage stability at higher ambient temperatures                                                                                                                                                       |
| 154                     | Enzyme Catalysis                 | Versatile peroxidase   | Choline chloride glycerol                                 | about a 4-fold improvement in activity as measured by Michaelis-Menten kinetics                         | Molecular dynamics showed solvent exposure of hydrophobic residues,                                                                                                                                           |
| 155                     | Interaction Assessment           | Phospholipid bilayers  | Various imidazolium and ammonium-based ILs                | N/A                                                                                                     | Claim that hydrogen bonding plays the most important intramolecular force role in protein-IL stability                                                                                                        |
| 156                     | Interaction Assessment           | N/A                    | N/A                                                       | N/A                                                                                                     | Review focuses entirely on protein-IL interactions                                                                                                                                                            |
| 157                     | Interaction Assessment           | Bovine Serum Albumin   | N-2',3'-epoxypropyl-Nmethyl-2-oxopyrrolidinium chloride   | N/A                                                                                                     | Molecular docking and spectroscopic experiments elucidate some protein-IL hydrophobic interactions are key                                                                                                    |
| 158                     | Interaction Assessment           | Bovine Serum Albumin   | N-2',3'-epoxypropyl-Nmethyl-2-oxopyrrolidinium salicylate | N/A                                                                                                     | Molecular docking and spectroscopic experiments elucidate some protein-IL interactions                                                                                                                        |
| 159                     | Enzyme Catalysis                 | Glucose Oxidase        | (1-alkyl 3-methyl-imidazolium bromides                    | N/A                                                                                                     | Ionic liquid with more hydrophobic character prevented enzyme activity at similar concentrations                                                                                                              |
| 160                     | Thermal Stabilization            | Bovine Serum Albumin   | Various choline ILs                                       | Increases thermal stability by 16°C                                                                     | Assessment of IL-BSA interactions and the thermal stabilization effect                                                                                                                                        |

| <b>Reference Number</b> | <b>Application/Protein Class</b> | <b>Protein/Peptide</b>    | <b>Ionic Liquid(s) Used</b>                                                                                       | <b>Stabilization Improvements (generally time or temperature)</b> | <b>Findings/Application</b>                                                                                                    |
|-------------------------|----------------------------------|---------------------------|-------------------------------------------------------------------------------------------------------------------|-------------------------------------------------------------------|--------------------------------------------------------------------------------------------------------------------------------|
| 161                     | Thermal Stabilization            | $\beta$ -lactoglobulin    | Choline-based IL mixtures                                                                                         | N/A                                                               | ILs increased thermal stability of $\beta$ -lactoglobulin                                                                      |
| 162                     | Enzyme Catalysis                 | Lysozyme                  | 1-octyl-3-methylimidazolium dodecylbenzenesulfonate                                                               | Enhanced activity by about 10%                                    | IL at concentration around 1 mM enhanced enzyme activity                                                                       |
| 163                     | Enzyme Catalysis                 | cytochrome-c              | Alginate acid-derived DES                                                                                         | 5.5-fold enzyme activity                                          | Alginate-derived DES can be used to enhance enzyme activity drastically                                                        |
| 164                     | Interaction Assessment           | Collagen                  | choline serinate                                                                                                  | Increased thermal stability from 61°C to 87°C                     | Using IL coated nanoparticles can allow for stabilization of fibrous proteins                                                  |
| 165                     | Interaction Assessment           | Green Fluorescent Protein | 1-butyl-3-methylimidazolium and 1-butyl-1-methylpyrrolidinium cations with chloride, acetate, and triflate anions | N/A                                                               | Suggest that multiple analytical techniques (CD, UV/Vis, NMR, SAXS) should be used to properly assess protein stability in ILs |
| 166                     | Thermal Stabilization            | Various                   | Various                                                                                                           | N/A                                                               | Review covering how mixtures of ILs can work synergistically to stabilize proteins                                             |
| 167                     | Various/Other                    | Various                   | Various                                                                                                           | N/A                                                               | Review covering how ILs can play a role in protein refolding <i>in vitro</i>                                                   |
| 168                     | Various/Other                    | Various                   | Various                                                                                                           | N/A                                                               | Review of ILs aiding in amyloidogenesis                                                                                        |

### Supporting Information Table 7. Antimicrobial

| <b>Reference Number</b> | <b>Ionic Liquid(s) or ionic liquid class Used</b>                                | <b>Gram-negative Bacteria</b>                                                        | <b>Gram-positive bacteria</b>                                                 | <b>Fungi</b>         | <b>Mold</b> | <b>Membrane Interaction Assessment</b> |
|-------------------------|----------------------------------------------------------------------------------|--------------------------------------------------------------------------------------|-------------------------------------------------------------------------------|----------------------|-------------|----------------------------------------|
| 169                     | methylimidazolium chloride                                                       | <i>V. fischeri</i>                                                                   |                                                                               |                      |             |                                        |
| 170                     | 1-alkyl-3-methyl imidazolium bromide and 1-alkyl-3-methyl pyridinium bromide ILs | <i>E. coli</i><br><i>P. fluorescens</i>                                              | <i>S. aureus</i><br><i>B. subtilis</i>                                        | <i>S. cerevisiae</i> |             |                                        |
| 171                     | 1-alkyl-3- methylimidazolium chloride ILs                                        | <i>E. coli</i>                                                                       | <i>S. aureus</i><br><i>E. faecium</i><br><i>E. hirae</i>                      |                      |             |                                        |
| 172                     | 1-alkylquinolinium bromide ILs                                                   | <i>E. coli</i><br><i>P. aeruginosa</i><br><i>P. mirabilis</i><br><i>K. aerogenes</i> | <i>S. aureus</i><br>MRSA<br><i>S. epidermidis</i><br>MRSE<br><i>B. cereus</i> | <i>C. tropicalis</i> |             |                                        |

| <i>Reference Number</i> | <i>Ionic Liquid(s) or ionic liquid class Used</i>                         | <i>Gram-negative Bacteria</i>                                                                                                      | <i>Gram-positive bacteria</i>                                                                                               | <i>Fungi</i>                               | <i>Mold</i> | <i>Membrane Interaction Assessment</i> |
|-------------------------|---------------------------------------------------------------------------|------------------------------------------------------------------------------------------------------------------------------------|-----------------------------------------------------------------------------------------------------------------------------|--------------------------------------------|-------------|----------------------------------------|
| 173                     | 1-alkyl-3-methylimidazolium and 1-alkylpyridinium bromides                | <i>E. coli</i><br><i>K. pneumoniae</i><br><i>P. aeruginosa</i>                                                                     | <i>S. aureus</i><br><i>M. luteus</i><br><i>S. epidermidis</i><br><i>B. subtilis</i>                                         | <i>C. albicans</i>                         |             |                                        |
| 174                     | Gemini imidazolium                                                        | <i>E. coli</i>                                                                                                                     |                                                                                                                             |                                            |             |                                        |
| 175                     | [C <sub>16</sub> MIm][Cl] and [(C <sub>10</sub> ) <sub>2</sub> MIm][Cl]   | <i>E. coli</i>                                                                                                                     | <i>S. aureus</i>                                                                                                            | <i>C. albicans</i><br><i>C. tropicalis</i> |             |                                        |
| 176                     | Anthracene-Imidazolium Bromide                                            | N/A                                                                                                                                | <i>S. haemolyticus</i><br><i>S. epidermidis</i>                                                                             |                                            |             |                                        |
| 177                     | theophylline                                                              | <i>E. coli</i>                                                                                                                     | N/A                                                                                                                         |                                            |             |                                        |
| 178                     | CAGE                                                                      | <i>E. coli</i>                                                                                                                     | N/A                                                                                                                         |                                            |             |                                        |
| 179                     | triphenylamine-phosphonium                                                | <i>E. coli</i><br><i>K. pneumoniae</i><br><i>A. baumannii</i><br><i>P. aeruginosa</i><br><i>E. aerogenes</i>                       | <i>S. aureus</i><br><i>E. faecium</i>                                                                                       |                                            |             |                                        |
| 180                     | tetradecyltrimethylammonium theophyllinate                                | <i>E. coli</i>                                                                                                                     | <i>B. cereus</i>                                                                                                            |                                            |             |                                        |
| 181                     | 2- (methacryloyloxy)ethyl]dimethylheptyl ammonium dodecylbenzenesulfonate | <i>S. maltophilia</i>                                                                                                              | <i>M. luteus</i>                                                                                                            |                                            |             |                                        |
| 182                     | imidazolium                                                               | <i>E. coli</i><br><i>S. Taphimurium</i><br><i>C. freundii</i><br><i>P. mirabllis</i><br><i>P. aeruginosa</i><br><i>A. fischeri</i> | <i>S. aureus</i><br><i>L. moncytogenes</i><br><i>B. cereus</i><br><i>E. faecalis</i><br><i>L. sakei</i><br><i>L. lactis</i> |                                            |             |                                        |
| 183                     | [Glycine]Cl                                                               | <i>E. coli</i>                                                                                                                     | <i>S. aureus</i>                                                                                                            | <i>M. albicans</i>                         |             |                                        |

| <b>Reference Number</b> | <b>Ionic Liquid(s) or ionic liquid class Used</b>                                                               | <b>Gram-negative Bacteria</b>       | <b>Gram-positive bacteria</b>                | <b>Fungi</b> | <b>Mold</b>                              | <b>Membrane Interaction Assessment</b> |
|-------------------------|-----------------------------------------------------------------------------------------------------------------|-------------------------------------|----------------------------------------------|--------------|------------------------------------------|----------------------------------------|
| 184                     | [MIP-tPP][BF <sub>4</sub> ], [MIP-tPP][PF <sub>6</sub> ], and [MIP-tPP][CF <sub>3</sub> COO]                    | N/A                                 | S. aureus                                    |              |                                          |                                        |
| 185                     | 1-allyl-3-methylimidazolium chloride                                                                            | E. coli                             | S. aureus                                    |              |                                          |                                        |
| 186                     | salicylidene-iminothiazole and benzylidene-bis-iminothiazole                                                    | E. coli<br>A. hydrophilia<br>Vibrio | S. aureus                                    |              |                                          |                                        |
| 187                     | 3-(2- (methacryloyloxy)ethyl)-1-alkyl imidazoliums                                                              | E. coli                             | N/A                                          |              |                                          |                                        |
| 188                     | 1-vinyl-3-butylimidazolium bromide and 1-vinyl-3-butylimidazolium acrylamide                                    | E. coli                             | S. aureus<br>B. subtilis                     | C. albicans  | Asp. niger<br>Asp.<br>Oryzae<br>Rhizopus |                                        |
| 189                     | 1-butyl-3-methylimidazolium hexafluorophosphate                                                                 | N/A                                 | S. epidermidis                               |              |                                          |                                        |
| 190                     | 1-vinyl-3-butylimidazolium chloride and 1-vinyl-3-ethylimidazolium tetrafluoroborate                            | E. coli                             | S. aureus<br>VREF<br>MRSA                    |              |                                          |                                        |
| 191                     | imidazolium-ferrocene                                                                                           | E. coli                             | S. aureus                                    |              |                                          |                                        |
| 192                     | 1-vinyl-3- hexylimidazolium bromide, 1-vinyl-3-allylimidazolium bromide and 1-vinyl-3-butylimidazolium chloride | P. aeruginosa                       | S. aureus                                    |              |                                          |                                        |
| 193                     | Imidazolium, Quaternary Ammonium, and DABCO-dium                                                                | E. coli                             | S. aureus                                    |              |                                          |                                        |
| 194                     | Various (review of poly(ILs) for antimicrobial purposes)                                                        | Various                             | Various                                      |              |                                          |                                        |
| 195                     | choline deoxycholate and choline laurylsarcosinate                                                              | E. coli<br>P. aeruginosa            | N/A                                          |              |                                          |                                        |
| 196                     | cholinium, imidazolium, pyridinium                                                                              | K. pneumoniae                       | S. aureus<br>B. subtilis                     |              |                                          |                                        |
| 197                     | pyrithione                                                                                                      | E. coli                             | L. monocytogenes<br>G.<br>stearothermophilus |              |                                          |                                        |



| <i>Reference Number</i> | <i>Ionic Liquid(s) or ionic liquid class Used</i>            | <i>Gram-negative Bacteria</i>                                  | <i>Gram-positive bacteria</i>                                                              | <i>Fungi</i>                                                  | <i>Mold</i> | <i>Membrane Interaction Assessment</i>                    |
|-------------------------|--------------------------------------------------------------|----------------------------------------------------------------|--------------------------------------------------------------------------------------------|---------------------------------------------------------------|-------------|-----------------------------------------------------------|
| 198                     | imidazolium, pyridinium                                      | <i>E. coli</i><br><i>P. aeruginosa</i><br><i>A. baumannii</i>  | <i>S. aureus</i><br><i>L. monocytogenes</i><br><i>B. subtilis</i><br><i>S. epidermidis</i> | <i>C. albicans</i>                                            |             |                                                           |
| 199                     | imidazolium                                                  | <i>E. coli</i><br><i>K. pneumoniae</i><br><i>P. aeruginosa</i> | <i>S. aureus</i><br><i>B. subtilis</i>                                                     |                                                               |             |                                                           |
| 200                     | Pyrrolidinium                                                | <i>E. coli</i>                                                 | <i>S. aureus</i>                                                                           |                                                               |             |                                                           |
| 201                     | imidazolium                                                  | <i>E. coli</i>                                                 | <i>S. aureus</i>                                                                           |                                                               |             |                                                           |
| 202                     | 1-butyl-3-methylimidazolium chloride and choline chloride    |                                                                |                                                                                            |                                                               |             | Neutron refractory assessment of IL-membrane interactions |
| 203                     | 1-butyl-3-methylimidazolium chloride and hexafluorophosphate |                                                                |                                                                                            |                                                               |             | Molecular Dynamics of IL-membrane interactions            |
| 204                     | Various imidazolium and choline ILs                          |                                                                |                                                                                            |                                                               |             | Review of IL-membrane interactions                        |
| 205                     | diketopyrrolopyrrole-based ionic liquid                      | <i>E. coli</i>                                                 |                                                                                            |                                                               |             | Molecular dynamics simulations to understand interactions |
| 208                     | 1-butyl-3-methylimidazolium hexafluorophosphate              |                                                                | <i>S. epidermidis</i>                                                                      |                                                               |             |                                                           |
| 206                     | Benzimidazolium based                                        | <i>E. coli</i>                                                 | <i>S. aureus</i><br>MRSA                                                                   |                                                               |             |                                                           |
| 207                     | Choline undeconoate                                          |                                                                |                                                                                            | <i>C. albicans</i><br><i>F. solani</i><br><i>A. fumigatus</i> |             |                                                           |

**Supporting Information Table 8. Biosensing**

LOD = limit of detection, LLOQ = lower limit of quantification, HLOQ = higher limit of quantification

| <b>Reference Number</b> | <b>Analyte Class</b>   | <b>Ionic Liquid(s) Used</b>                                      | <b>Analyte</b>            | <b>Immobilized Molecule(s)</b>           | <b>LOD (g/mL or M)</b> | <b>LLOQ (g/mL or M)</b> | <b>HLOQ (g/mL or M)</b> | <b>Applications/Use</b>                                                     |
|-------------------------|------------------------|------------------------------------------------------------------|---------------------------|------------------------------------------|------------------------|-------------------------|-------------------------|-----------------------------------------------------------------------------|
| 210                     | Glucose                | 1-butyl-3- methylimidazolium hexafluorophosphate                 | Glucose                   | Glucose oxidase                          | NS                     | 1.00E-07                | 2.00E-05                | Detection and quantification of blood glucose levels                        |
| 211                     | Glucose                | 1-Butyl-3-methyl-imidazolium tetrafluoroborate                   | Glucose                   | Glucose oxidase                          | 1.50E-06               | 3.00E-06                | 9.00E-03                | Detection and quantification of blood glucose levels                        |
| 212                     | Biomarker              | 1-butyl-3-methylimidazolium hexafluorophosphate                  | Adrenaline                | Laccase                                  | 2.93E-07               | 9.99E-07                | 2.13E-04                | Quantification over wide range for pharmaceutical formulations              |
| 213                     | Biomarker              | 1-butyl-3-methylimidazolium hexafluorophosphate                  | Ascorbic Acid<br>Dopamine | Single Wall Carbon Nanotubes             | 4.00E-13<br>8.00E-14   | NS                      | NS                      | Detection of dopamine even in presence of ascorbic acid                     |
| 214                     | Glucose                | n-octylpyridinium hexafluorophosphate                            | Glucose<br>Ethyl Alcohol  | Glucose Oxidase<br>Alcohol Dehydrogenase | NS                     | NS                      | NS                      | Early use of carbon nanotubes in IL-biosensing                              |
| 215                     | Therapeutic            | 1-ethyl-3-methylimidazolium hexafluorophosphate                  | Diclofenac                | Cu(OH) <sub>2</sub> nanoparticles        | 4.00E-08               | 1.80E-07                | 1.19E-04                | Detection of small molecule drugs in serum samples                          |
| 216                     | Glucose                | 1-(3-Aminopropyl)-3-methylimidazolium bromide                    | Glucose                   | Glucose oxidase                          | NS                     | 2.00E-03                | 1.60E-02                | Glucose detection within the relevant human blood glucose level range       |
| 217                     | Internalized Chemicals | 1-Ethyl-3-methylimidazolium tetrafluoroborate                    | Catechol                  | Graphene                                 | 8.00E-09               | 2.50E-08                | 1.11E-05                | Functionalization of graphene with IL for biosensor                         |
| 218                     | Therapeutic            | 1- butyl-1-methylpyrrolidinium bis(trifluoromethylsulfonyl)imide | Losartan                  | Graphene                                 | 1.82E-09               | 3.00E-09                | 1.00E-02                | Detection of antihypertensive drug for treating patients with heart disease |

| <b>Reference Number</b> | <b>Analyte Class</b>   | <b>Ionic Liquid(s) Used</b>                                   | <b>Analyte</b>                                    | <b>Immobilized Molecule(s)</b> | <b>LOD (g/mL or M)</b>           | <b>LLOQ (g/mL or M)</b>          | <b>HLOQ (g/mL or M)</b>          | <b>Applications/Use</b>                                                                                   |
|-------------------------|------------------------|---------------------------------------------------------------|---------------------------------------------------|--------------------------------|----------------------------------|----------------------------------|----------------------------------|-----------------------------------------------------------------------------------------------------------|
| 219                     | Biomarker              | 1-ethyl-3-methylimidazolium bis(trifluoromethylsulfonyl)imide | Dopamine                                          | N/A                            | 3.30E-08                         | 2.00E-07                         | 3.28E-04                         | Detection of dopamine in urine                                                                            |
| 220                     | Internalized Chemicals | 1-hexylpyridinium hexafluorophosphate                         | Trichloroacetic acid                              | Myoglobin                      | 3.30E-04                         | 1.00E-03                         | 2.00E-01                         | TCA used widely in topical cosmetic treatments                                                            |
| 221                     | Therapeutic            | n-hexyl-3- methylimidazolium hexafluorophosphate              | Epinine                                           | N/A                            | 2.00E-07                         | 7.00E-07                         | 9.00E-04                         | Monitoring serum levels of epinine a catecholamine drug used to treat congestive heart failure            |
| 222                     | Therapeutic            | 1-butyl-3-methylimidazolium hexafluorophosphate               | 6-thioguanine<br>6-mercaptopurine<br>azathioprine | ZnO<br>Nanoparticles           | 5.00E-08<br>1.10E-07<br>9.00E-08 | 2.00E-07<br>3.00E-07<br>4.00E-07 | 2.50E-04<br>4.00E-04<br>4.00E-04 | Monitoring of serum levels of three common thiopurines which are used for cancer and autoimmune treatment |
| 223                     | Therapeutic            | 1-butyl-3-methylimidazolium tetrafluoroborate                 | Doxorubicin<br>Dasatinib                          | N/A                            | 9.00E-09<br>5.00E-07             | 7.00E-08<br>1.00E-06             | 5.00E-04<br>1.2E-03              | Simultaneous detection of these two commonly used chemotherapeutics                                       |
| 224                     | Therapeutic            | 1-butyl-1-methylpiperidinium hexafluorophosphate              | Daclatasvir<br>Sofosbuvir<br>Ledipasvir           | Cobalt<br>Nanoparticles        | 2.77E-10<br>1.86E-09<br>7.29E-09 | 2.00E-07<br>7.00E-08<br>3.00E-07 | 1.00E-06<br>1.00E-06<br>8.00E-06 | Detection of hepatitis C antivirals                                                                       |
| 225                     | Biomarker              | 1-butyl-3-methylimidazolium tetrafluoroborate                 | Nitric Oxide                                      | NO Reductase                   | 7.00E-08                         | 2.30E-07                         | 4.76E-06                         | NO is an important cell signaling molecule, and has implications in angiogenesis                          |
| 226                     | Biomarker              | 1-butyl-3-methylimidazolium chloride                          | Cholesterol                                       | Cholesterol Oxidase            | 4.80E-07                         | 1.00E-06                         | 1.20E-05                         |                                                                                                           |
| 227                     | Biomarker              | 1-butyl-3-methylimidazolium tetrafluoroborate                 | C-reactive Protein                                | anti-CRP antibodies and BSA    | 5.00E-12                         | 1.00E-10                         | 1.00E-06                         | Detection of clinically relevant inflammatory biomarker for cardiovascular diseases.                      |

| <i>Reference Number</i> | <b>Analyte Class</b>   | <b>Ionic Liquid(s) Used</b>                                                    | <b>Analyte</b>            | <b>Immobilized Molecule(s)</b>                | <b>LOD (g/mL or M)</b> | <b>LLOQ (g/mL or M)</b> | <b>HLOQ (g/mL or M)</b> | <b>Applications/Use</b>                                              |
|-------------------------|------------------------|--------------------------------------------------------------------------------|---------------------------|-----------------------------------------------|------------------------|-------------------------|-------------------------|----------------------------------------------------------------------|
| 228                     | Therapeutic            | 1-butyl-3-methylimidazolium hexafluorophosphate                                | Irinotecan                | Gold nanoparticles                            | 1.55E-09               | 4.00E-09                | 1.79E-06                | Detection of chemotherapeutic in presence of electroactive molecules |
| 229                     | Internalized Chemicals | choline phenylalanine                                                          | Ethyl Alcohol             | Alcohol Dehydrogenase                         | 7.00E-03               | 2.20E-02                | 1.00E-01                | Detection of ethyl alcohol in serum samples                          |
| 230                     | Glucose                | choline phenylalanine                                                          | Glucose<br>Ethyl Alcohol  | Glucose Oxidase<br>Alcohol Dehydrogenase      | 3.35E-04<br>3.70E-03   | 1.01E-03<br>1.11E-02    | 1.05E-02<br>1.20E-01    | Beverage glucose detection of ethyl alcohol in serum samples         |
| 231                     | Biomarker              | 1-butyl-3-methylimidazolium tetrafluoroborate and choline dihydrogen phosphate | Interleukin 6<br>Cortisol | anti IL-6 antibody<br>antil cortisol antibody | 2.00E-13<br>1.00E-10   | NS                      | NS                      | Detection of biomarkers in human sweat                               |
| 232                     | Biomarker              | 1-dodecyl-3-methylimidazolium bromide                                          | Hydrogen Peroxide         | Horseradish Peroxidase                        | 2.50E-07               | 2.00E-06                | 4.20E-04                | Biological metabolism studies                                        |
| 233                     | Internalized Chemicals | 1-vinyl-3-ethylimidazolium bromide                                             | Catechol                  | Tyrosinase                                    | 2.00E-05               | 3.90E-05                | 2.50E-04                |                                                                      |
| 234                     | Therapeutic            | 1-butyl-3-methylimidazolium hexafluorophosphate                                | microRNA-34a              | DNA probe                                     | 8.20E-07               | 2.00E-06                | 1.00E-05                | Detection of microRNA in human serum                                 |
| 235                     | Biomarker              | 1-Hexylpyridinium hexafluorophosphate                                          | DNA                       | ssDNA probe                                   | 3.17E-14               | 1.00E-13                | 1.00E-06                | DNA detection                                                        |
| 236                     | Therapeutic            | 1-octylpyridinium hexaflourophosphate                                          | Doxepin                   | N/A                                           | 2.10E-08               | 5.00E-08                | 2.40E-05                | Antidepressant sensor for serum and pharmaceutical formulations      |

| <b>Reference Number</b> | <b>Analyte Class</b>   | <b>Ionic Liquid(s) Used</b>                                                                      | <b>Analyte</b>                              | <b>Immobilized Molecule(s)</b> | <b>LOD (g/mL or M)</b>           | <b>LLOQ (g/mL or M)</b>          | <b>HLOQ (g/mL or M)</b>          | <b>Applications/Use</b>                                        |
|-------------------------|------------------------|--------------------------------------------------------------------------------------------------|---------------------------------------------|--------------------------------|----------------------------------|----------------------------------|----------------------------------|----------------------------------------------------------------|
| 237                     | Biomarker              | 1-butyl-3-methylimidazolium tetrafluoroborate                                                    | Cortisol                                    | anti cortisol antibody         | 5.00E-09<br>1.00E-08<br>1.00E-09 | NS                               | NS                               | Detection of cortisol in sweat, urine, and saliva              |
| 238                     | Therapeutic            | 1-butyl-3-methylimidazolium hexafluorophosphate                                                  | Meloxicam                                   | N/A                            | 1.00E-09                         | 5.00E-09                         | 1.50E-06                         | Ultrasound assisted <i>in situ</i> microextraction             |
| 239                     | Therapeutic            | 1-butyl-3-methylimidazolium hexafluorophosphate<br>1-butyl-3-methylimidazolium tetrafluoroborate | Duloxetine                                  | N/A                            | 8.00E-07                         | 2.00E-06                         | 1.50E-03                         | Ultrasound assisted <i>in situ</i> microextraction             |
| 240                     | Therapeutic            | 1-vinyl-3-octylimidazolium bromide                                                               | Empagliflozin<br>Metformin<br>Canagliflozin | N/A                            | 1.30E-09<br>6.00E-09<br>8.00E-10 | 5.00E-09<br>2.00E-08<br>5.00E-09 | 1.20E-06<br>1.80E-06<br>1.00E-07 | Extraction of antidiabetic drugs from human plasma             |
| 241                     | Various                | Various                                                                                          | Various                                     | N/A                            | Various                          | Various                          | Various                          | Review of ILs used in extraction of biological samples         |
| 242                     | Internalized Chemicals | 1-alkyl-3-methylimidazolium hexafluorophosphate                                                  | Ethanol                                     | Alcohol Dehydrogenase          | 5.00E-06                         | 1.20E-05                         | 2.50E-01                         | Chemiluminescent biosensor                                     |
| 243                     | Other/Various          | 1-(2'-hydroxyethyl)-3-methylimidazolium bis-(trifluoromethane sulfonimide)                       | p-phenylenediamine                          | N/A                            | 7.00E-09                         | 2.00E-08                         | 1.00E-05                         | Detection of a commonly used textile molecule in urine samples |
| 244                     | Therapeutic            | 1-hexyl-3-methylimidazolium tryptophan                                                           | Cu <sup>2+</sup><br>Levodopa                | N/A                            | 1.70E-08<br>1.60E-07             | 5.10E-08<br>5.50E-07             | 1.60E-05<br>5.00E-06             | "on-off" biosensor for dual use detection                      |
| 245                     | Other/Various          | 1-ethyl-3-methylimidazolium bis(trifluoromethylsulfonyl)imide                                    | N/A                                         | N/A                            | N/A                              | N/A                              | N/A                              | Ultra-sensitive pressure sensor for potential, synthetic skin  |
